# Supplementary material
Source: PubMed Central journal article supplement (PMC3169306)
Supplement: NIHMS317682-supplement-S_Tables.pdf [file NIHMS317682-supplement-S_Tables.pdf]

## Supplemental Tables

Table 1S

*Genes displaying significant up-/down regulation following transfection of siRNA for SAMD9 and RGL2*

| <b>SAMD9</b> | <b>Fold Change</b> | <b>p Value</b> |
|--------------|--------------------|----------------|
| NLRP8        | 2.02               | 4.0E-21        |
| TMEM35       | 2.02               | 1.0E-09        |
| AMMECR1      | 2.02               | 4.5E-13        |
| MAT2B        | 2.11               | 1.5E-10        |
| SHROOM4      | 2.13               | 9.8E-13        |
| LOC389137    | 2.23               | 1.5E-18        |
| AMMECR1      | 2.37               | 5.2E-07        |
| EGR1         | 3.04               | 1.3E-13        |
|              |                    |                |
| <b>RGL2</b>  |                    |                |
| KIF3B        | 0.39               | 4.5E-10        |
| NFIA         | 0.47               | 2.7E-04        |
| OSGIN1       | 0.48               | 7.2E-07        |
| SERPINB2     | 0.49               | 5.5E-13        |
| KIF3B        | 0.50               | 9.0E-22        |
| EDN1         | 2.10               | 3.1E-10        |
| AMMECR1      | 2.13               | 4.5E-13        |
| PTS          | 2.18               | 5.4E-13        |
| AMMECR1      | 2.20               | 5.2E-07        |
| LOC389137    | 2.25               | 1.5E-18        |
| PTS          | 2.31               | 1.6E-13        |
| SPRR2A       | 2.35               | 9.4E-07        |
| OSAP         | 2.52               | 4.5E-10        |
| SPRR2F       | 2.56               | 9.3E-10        |
| OSAP         | 2.78               | 9.9E-14        |
| SPRR2C       | 2.83               | 2.9E-13        |

Table 2S

Oligonucleotide sequences for reporter assay

| <b>Primer name</b> | <b>Sequence</b>                                     |
|--------------------|-----------------------------------------------------|
| -4306 Mlul top     | 5'-CGACGCGTTGACGTCCTTTTTGTTGATG-3'                  |
| -3276 Mlul top     | 5'-CGACGCGTGTTTGCTCCAGGTTTTCG-3'                    |
| -2250 Mlul top     | 5'-CGACGCGTTCCTTCTCATTTGGGTGAC-3'                   |
| -1329 Mlul top     | 5'-CGACGCGTTCCTTCAAAGGGTCTGTG-3'                    |
| -585 Mlul top      | 5'-CGACGCGTTTTCTCTCTGGCCCTGAC-3'                    |
| -253 Mlul top      | 5'-CGACGCGTCTGCAGCCCTCAAACCTC-3'                    |
| -132 Mlul top      | 5'-CGACGCGTGCTGTAATTTTCAGATCTGAG-3'                 |
| -67 XhoI Bott      | 5'-CCGCTCGAGGTTGGGGAAGGAAGAATATAG-3'                |
| -89 XhoI Bott      | 5'-CCGCTCGAGGTTTGGTTTCAGTTTCATTTTC-3'               |
| -114 XhoI Bott     | 5'-CCGCTCGAGATCTGAAATTACAGCACCG-3'                  |
| -114 Mlul -89 XhoI | 5'-CGACGCGTGATCTGAGAAATGAAACTGAAACCAAACCTCGAGCGG-3' |

Table 3S

*Real-time RT-PCR oligonucleotide sequences*

| <b>Primer name</b> | <b>Sequence</b>               |
|--------------------|-------------------------------|
| SAMD9 F            | 5'-TGGTTGCAGTGGGTGAATAGG-3'   |
| SAMD9 R            | 5'-TCTGGAAGGTTAAGTTGCTTTGC-3' |
| RGL2 F             | 5'-TCACAAGCCGCCAATATCG-3'     |
| RGL2 R             | 5'-TCCGGGTATCCAGTAGGTGTCT-3'  |
| EGR1 F             | 5'-GGCGAGCAGCCCTACGA-3'       |
| EGR1 R             | 5'-GGGCAGTCGAGTGGTTTGG-3'     |
| ACTIN F            | 5'-TTGCCGACAGGATGCAGAAGGA-3'  |
| ACTIN R            | 5'-AGGTGGACAGCGAGGCCAGGAT-3'  |
